# Supplementary material
Source: PubMed Central journal article supplement (PMC7675300)
Supplement: PMRJ-13-81-s001.pdf [file PMRJ-13-81-s001.pdf]

# Recuperación de COVID-19: Una guía para el paciente

Esta guía fue creada por los Departamentos de Medicina de Rehabilitación en Columbia University Irving Medical Center y Weill Cornell Medical Center como parte del Sistema hospitalario de Nueva York-Presbiteriano. Dentro de este paquete de información, encontrará información sobre la recuperación de COVID-19, la enfermedad causada por el nuevo virus SARS-CoV-19, también conocido como coronavirus.

La intención de esta guía es proporcionar información sobre cómo maximizar su recuperación de COVID-19 a través de la mejora de los músculos respiratorios y los músculos de los brazos y las piernas. El sueño y la nutrición también son importantes.

Agradecemos la oportunidad de participar en su cuidado, y le deseamos lo mejor en su recuperación. Por favor, póngase en contacto con nosotros en uno de los números a continuación para hacer una cita para discutir sus necesidades específicas de rehabilitación después del alta.

## **Weill Cornell Department of Rehabilitation Medicine**

525 E 68th St 16th Floor, New York, NY 10065

Phone: (212) 746-1500

<https://weillcornell.org/services/rehabilitation-medicine>

rehab@med.cornell.edu

## **Columbia Department of Rehabilitation and Regenerative Medicine**

180 Fort Washington Ave, New York, NY 10032

Phone: (212) 305-3535

<https://www.columbiadoctors.org/rehabilitation-medicine>

rehabmed\_help@cumc.columbia.edu

## Ejercicios de Respiración:

- Los músculos que te ayudan a respirar en fortalecerse a medida que te recuperas de la infección pulmonar. Estos músculos incluyen el diafragma, así como los músculos en la pared torácica.
- Debería haber recibido **un incentivo espirómetro** cuando fue dado de alta del hospital. Este dispositivo ayuda a fortalecer los músculos respiratorios y a abrir los espacios aéreos de los pulmones. Está diseñado para ayudarle a tomar respiraciones largas, lentas y profundas, como suspiros naturales o bostezos.
- Usted debe utilizar el espirómetro incentivo durante 15 minutos durante todo el día, y se puede dividir esto en 3 sesiones

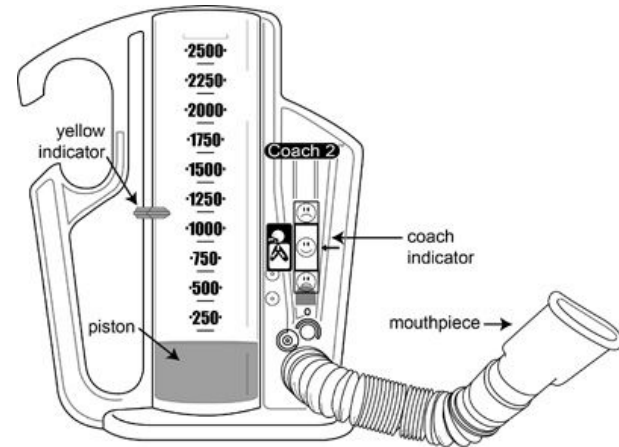

Un video: <https://youtu.be/-O-Zawtb32o>

### Cómo utilizar el espirómetro de incentivo

Siéntese erguido en una silla o en el borde de la cama.

Mantenga el espirómetro de incentivo en posición vertical. Respira normalmente.

Coloque la boquilla en la boca y selle los labios firmemente alrededor de ella.

**Respira lentamente** y tan profundamente como sea posible. Observe que la bola o el pistón se elevan hacia la parte superior de la Columna.

Mantenga la respiración el mayor tiempo posible (al menos durante 5 segundos). Saca la boquilla de la boca y exhala lentamente y deja que el pistón caiga al fondo de la columna.

**Descanse durante unos segundos** y repita los pasos de uno a cinco al menos 10 veces.

Coloque el indicador en el lado del espirómetro para mostrar su mejor esfuerzo. Utilice el indicador como objetivo para trabajar durante cada respiración profunda lenta.

Después de cada juego de 10 respiraciones profundas, tose para asegurarse de que los pulmones estén limpios.

## • Salud Mental

- Participar en la comunicación regular con fines sociales mientras está aislado. Usa teléfonos, videollamadas o redes sociales para interactuar con familiares y amigos.
- Es posible que tenga sentimientos de arrepentimiento, resentimiento, soledad, impotencia y depresión. Reconoce que estos son naturales después de lo que has pasado, y no tienes la culpa.
- Comer una dieta saludable, participar en los ejercicios descritos en este paquete, y dormir bien mejorará su perspectiva y sentimientos de bienestar.
- Muchas personas requieren apoyo emocional en estas circunstancias. Si necesita hablar con alguien inmediatamente, llame al 888-NYC-WELL (888-692-9355), o envíe un mensaje de texto "WELL" al 65173. Chatea en línea en [nyc.gov/nycwell](https://nyc.gov/nycwell).
- Apunte durante al menos 7 horas de sueño por noche.
- Haga ejercicio durante el día, lo que le ayudará a sentirse más cansado por la noche.
- Evite la cafeína después del mediodía. La cafeína dura en el cuerpo durante muchas horas y afecta tu sueño mucho después del último uso.
- Evite el alcohol, ya que reduce el sueño REM y también hace que se despierte por la noche para orinar.
- Evite la exposición a la luz azul durante al menos 1 hora antes de acostarse activando el modo de turno de noche en su teléfono o portátil, apagando el televisor.
- Considere meditar antes de acostarse con la ayuda de aplicaciones de meditación guiadas, como Headspace o Calm. Deja que tu mente venga a descansar.
- Intenta ir a la cama a la misma hora cada noche y levantarte a la misma hora cada mañana. Evite pasar tiempo despierto en su cama durante el día y, si es posible, evite dormir la siesta durante el día.

## Prefacio al Ejercicio

- La rehabilitación pulmonar es un programa de ejercicios que te ayuda a mejorar tu dificultad para respirar, aumentar tu capacidad de ejercicio y mejorar la calidad de vida. Estos ejercicios incluyen ejercicios de respiración para fortalecer los músculos del pecho a medida que te recuperas de la infección pulmonar y los ejercicios de fortalecimiento muscular que abordan la debilidad y la pérdida muscular que puede ocurrir después de una larga estancia hospitalaria.
- La terapia de ejercicio en el hogar puede ser tan eficaz como un programa hospitalario en persona. Podemos ayudar a guiar su progreso con el telemonitoreo médico y fisioterapeuta usando visitas en video
- Si no está seguro acerca de su participación en el ejercicio, hable con su médico. Estos ejercicios están destinados a realizarse solos, así que no proceda si no se siente lo suficientemente bien como para hacer ejercicio.

Si su médico sugiere hablar con un fisioterapeuta antes de comenzar a hacer ejercicio, comuníquese con nuestro equipo de fisioterapeutas, llamando al 914-333-2404 o al 212-304-5794 para programar una cita. Además, también puede programar una cita enviando un correo electrónico a: [PTFacultyPractice@cumc.columbia.edu](mailto:PTFacultyPractice@cumc.columbia.edu). Con el fin de ser visto por un fisioterapeuta, usted necesitará obtener una receta de su médico.

- Caminar. Durante su período de recuperación, le animamos a caminar, incluso si está en casa, para mejorar su acondicionamiento general.
  - Semana 1: 5 minutos, 5 veces al día
  - Semana 2: 10 minutos, 3 veces al día
  - Semana 3: 15 minutos, 2 veces al día
- Posicionamiento – Pasar muchas horas en la espalda puede conducir a descondicionamiento y otros problemas médicos. Recomendamos sentarse erguido tanto como pueda durante el día, caminar por su espacio como se tolere, y cambiar de posición regularmente. Algunos pacientes tienen más fácil respirar en sus estómagos con una almohada debajo del pecho, que puede abrir diferentes partes de los pulmones.
- Monitoreo –
  - Opción 1: Es posible que tenga un oxímetro de pulso en casa con usted. Esto ayudará a controlar la frecuencia cardíaca y los niveles de oxígeno durante las actividades y los ejercicios. Compruebe y registre su frecuencia cardíaca y su nivel de oxígeno antes, durante y después de los ejercicios (se le proporciona un registro de ejercicios al final de este paquete) para monitorear cómo su cuerpo está respondiendo a sus ejercicios. Si puedes hablar durante el ejercicio, lo más probable es que no ejerzas demasiado. La saturación normal de oxígeno es 96-100% y no debe ir por debajo del 88% durante el ejercicio. Deja de hacer ejercicio y descansa si ves una caída en la saturación de oxígeno por debajo del 88%.
  - Opción 2: Si no tiene un oxímetro de pulso, puede evaluar cómo responde al ejercicio utilizando la escala de tasa Borg de esfuerzo percibido (RPE). Esto le permitirá auto-supervisar lo duro que está haciendo ejercicio. Al principio, incluso las cosas simples pueden sentirse muy difíciles, pero esto le ayudará a monitorear la mejora y la recuperación funcional a medida que las cosas mejoran. Compruebe y registre su RPE durante el ejercicio en el registro de ejercicios proporcionado.

OBJETIVO 4-6

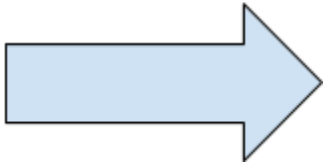

| RPE SCALE    | RATE OF PERCEIVED EXERTION                                                                                                                                     |
|--------------|----------------------------------------------------------------------------------------------------------------------------------------------------------------|
| <b>10</b> /  | <b>MAX EFFORT ACTIVITY</b><br>Feels almost impossible to keep going. Completely out of breath, unable to talk. Cannot maintain for more than a very short time |
| <b>9</b> /   | <b>VERY HARD ACTIVITY</b><br>Very difficult to maintain exercise intensity. Can barely breathe and speak only a few words                                      |
| <b>7-8</b> / | <b>VIGOROUS ACTIVITY</b><br>Borderline uncomfortable. Short of breath, can speak a sentence                                                                    |
| <b>4-6</b> / | <b>MODERATE ACTIVITY</b><br>Breathing heavily, can hold a short conversation. Still somewhat comfortable, but becoming noticeably more challenging             |
| <b>2-3</b> / | <b>LIGHT ACTIVITY</b><br>Feels like you can maintain for hours. Easy to breathe and carry a conversation                                                       |
| <b>1</b> /   | <b>VERY LIGHT ACTIVITY</b><br>Hardly any exertion, but more than sleeping, watching TV, etc                                                                    |

- 10** Maximo Esfuerzo
- 9** Esfuerzo muy dificil
- 7-8** Actividad vigorosa
- 4-6** Actividad Moderada
- 2-3** Actividad Suave
- 1.** Actividad muy suave

### Precauciones del Ejercicio

- Comience este programa de ejercicios después del alta del hospital y si no tener fiebre.
- Detenga el ejercicio inmediatamente si tiene dolor en el pecho, palpitaciones, agotamiento o mareos/aturdimiento. Comuníquese con un médico de inmediato si estos síntomas persisten.
- Mantenga la máscara puesta cuando haga ejercicio si hay otros a su alrededor.
- Consulte los enlaces de YouTube que figuran en la última página de este manual para obtener más información.

## Ejercicios Instrucciones

|                                       |                                                                                                                                                                                                                                                                                                                                                                                                                                                                                                                                                                                                                                                                                                                                                                                                                                                                                                                                                                                                                                                                                                                                                                                                                                                                                                                                                                                                                                                                                                                                                                                                                                                  |
|---------------------------------------|--------------------------------------------------------------------------------------------------------------------------------------------------------------------------------------------------------------------------------------------------------------------------------------------------------------------------------------------------------------------------------------------------------------------------------------------------------------------------------------------------------------------------------------------------------------------------------------------------------------------------------------------------------------------------------------------------------------------------------------------------------------------------------------------------------------------------------------------------------------------------------------------------------------------------------------------------------------------------------------------------------------------------------------------------------------------------------------------------------------------------------------------------------------------------------------------------------------------------------------------------------------------------------------------------------------------------------------------------------------------------------------------------------------------------------------------------------------------------------------------------------------------------------------------------------------------------------------------------------------------------------------------------|
| <p><b>Instrucciones Generales</b></p> | <ul style="list-style-type: none"> <li>• Los 8 ejercicios en cada Fase son los mismos, pero la cantidad de tiempo que pasarás haciendo ejercicio aumentará a medida que prograses.</li> <li>• Si no tiene un oxímetro de pulso, escuche a su cuerpo. Si puedes hablar durante el ejercicio, lo más probable es que no ejerzas demasiado. Si es difícil hablar, entonces deténgase a tomar un descanso. Registre su RPE en el registro de ejercicios (en la última página de este paquete).</li> <li>• Si tiene oxímetro de pulso, úselo para controlar el nivel de oxígeno y la frecuencia cardíaca mientras realiza todos los ejercicios. Su objetivo es completar cada ejercicio de cada fase con su nivel de oxígeno que nunca cae por debajo del 88% - así que compruebe a menudo durante el programa de ejercicios. Deténgase si cae por debajo del 88%, y póngase en contacto con su médico o fisioterapeuta. Registre su nivel de oxígeno y frecuencia cardíaca en el registro de ejercicios (en la última página de este paquete).</li> <li>• Realizar todos los ejercicios con un teléfono cercano, o cuando otra persona está en el hogar, en caso de que no responda bien y desarrolle síntomas.</li> <li>• El equipo requerido para este programa de ejercicios a continuación incluye:</li> <li>• Espirómetro de incentivo, silla y una superficie estabilizadora para apoyar su equilibrio, como una mesa, encimera o cómoda y oxímetro de pulso (si lo tiene)</li> <li>• Si usted tiene alguna pregunta o inquietud, por favor consulte con un médico o fisioterapeuta en cualquier momento – Estamos aquí para usted!</li> </ul> |
| <p><b>Fase 1:</b></p>                 | <p>Completa cada ejercicio y descansa entre cada ejercicio. Realice este circuito de ejercicios de principio a fin una vez, pero repita el circuito hasta cuatro veces al día. Como sugerencia, realice un conjunto de ejercicios separados por un período de tiempo de 2-3 horas entre cada conjunto, para un total de cuatro veces al día. <u>Realice esto durante 7 días consecutivos.</u></p>                                                                                                                                                                                                                                                                                                                                                                                                                                                                                                                                                                                                                                                                                                                                                                                                                                                                                                                                                                                                                                                                                                                                                                                                                                                |
| <p><b>Fase 2:</b></p>                 | <p>Completa cada ejercicio y descansa entre cada ejercicio. Realizar este circuito de ejercicios dos veces, hasta <b>2 veces al día</b>. Como sugerencia, realizar un conjunto de ejercicios por la mañana y otro por la tarde, para un total de dos veces al día. <u>Realice esto durante 3 días consecutivos. El cuarto día de esta semana, descanse del programa de ejercicios.</u></p>                                                                                                                                                                                                                                                                                                                                                                                                                                                                                                                                                                                                                                                                                                                                                                                                                                                                                                                                                                                                                                                                                                                                                                                                                                                       |
| <p><b>Fase 3:</b></p>                 | <p>Completa cada ejercicio y descansa entre cada ejercicio, según lo prescrito. Realiza este circuito de ejercicios tres veces consecutivas, hasta 2 veces al día. Como sugerencia, realice un conjunto de ejercicios por la mañana y otro por la tarde. <u>Realice esto durante 3 días consecutivos</u></p>                                                                                                                                                                                                                                                                                                                                                                                                                                                                                                                                                                                                                                                                                                                                                                                                                                                                                                                                                                                                                                                                                                                                                                                                                                                                                                                                     |
| <p><b>Fase 4:</b></p>                 | <p>Al final de 2 semanas, puede proceder a la realización de los videos de YouTube que se presentan a continuación:</p> <ul style="list-style-type: none"> <li>• Rehabilitación pulmonar, Inglés: <a href="https://youtu.be/PG3ThYK-bsE">https://youtu.be/PG3ThYK-bsE</a></li> <li>• Rehabilitación pulmonar, español: <a href="https://youtu.be/exrZO6lxXmI">https://youtu.be/exrZO6lxXmI</a></li> </ul>                                                                                                                                                                                                                                                                                                                                                                                                                                                                                                                                                                                                                                                                                                                                                                                                                                                                                                                                                                                                                                                                                                                                                                                                                                        |

## Program de Ejercicios

| Ejercicio                                   | Instrucciones                                                                                                                                                                                                                                                                                                                                                                              | Tiempo           | Diagrama                                                                                                  |
|---------------------------------------------|--------------------------------------------------------------------------------------------------------------------------------------------------------------------------------------------------------------------------------------------------------------------------------------------------------------------------------------------------------------------------------------------|------------------|-----------------------------------------------------------------------------------------------------------|
| <b>Respiración diafragmática</b>            | <p>Acuéstese boca arriba con la cabeza sobre una almohada y una almohada debajo de las rodillas, o las rodillas pueden estar dobladas. Pon una mano en el pecho y una mano en el vientre. Respira profundamente a través de la nariz, permitiendo que el pecho y el vientre se expandan y a través de la boca. Realice durante 1 minuto. Luego, descansa 30 segundos.</p>                  | <p>1 minuto</p>  | <p><sup>1</sup></p>    |
| <b>Ejercicio de Espirómetro o Incentivo</b> | <p>Siéntate lo más alto que puedas, con los omóplatos pellizcados hacia atrás y el pecho hacia fuera. Exhale completamente, luego con un espirómetro incentivo, exhale lentamente hasta su inhalación máxima y exhale lentamente. Realice durante 1 minuto. Luego, descansa 30 segundos.</p>                                                                                               | <p>5 minutos</p> | <p><sup>2</sup></p>   |
| <b>Sentadías arriba y abajo</b>             | <p>Comience por deslizarse hacia la parte delantera de la silla. a continuación, inclínate hacia adelante con los brazos y sube a una posición de pie. Baja los brazos mientras te levantas. Usa los brazos como contrapeso al avanzar cuando te sientes. De pie y sentado repetitivamente durante 30 segundos a un ritmo cómodo. Descanse en una posición sentada durante 30 segundos</p> | <p>30 seg</p>    | <p><sup>3</sup></p>  |

<sup>1</sup><https://my.clevelandclinic.org/health/articles/9445-diaphragmatic-breathing>

<sup>2</sup> <https://www.stonybrookmedicine.edu/patientcare/preoperative-services/general-wellness/incentive-spirometer-use>

<sup>3</sup> [https://www.hep2go.com/exercise\\_editor.php?exId=154&userRef=iekcijdgcmg](https://www.hep2go.com/exercise_editor.php?exId=154&userRef=iekcijdgcmg)

| Ejercicio                              | Instrucciones                                                                                                                                                                                                                                                                                                                                                                                                                                                    | Tiempo        | Diagrama                                                                                        |
|----------------------------------------|------------------------------------------------------------------------------------------------------------------------------------------------------------------------------------------------------------------------------------------------------------------------------------------------------------------------------------------------------------------------------------------------------------------------------------------------------------------|---------------|-------------------------------------------------------------------------------------------------|
| <p><b>Marcha de Pie</b></p>            | <p>Mientras está de pie, levanta la rodilla con control, haz una pausa con la rodilla en el aire durante 2 segundos, luego bájala y luego alterna a tu otro lado. Use un brazo o ambos brazos como apoyo, si es necesario para el equilibrio y la seguridad. Continúe alternando cada lado continuamente durante 30 s. Descanse en una posición sentada durante 30 s</p>                                                                                         | <p>30 seg</p> |  <p>4</p>    |
| <p><b>Alcance de brazo sentado</b></p> | <p>En una posición sentada, comienza colocando los brazos como la imagen de la izquierda, con los pulgares junto a los bolsillos delanteros opuestos. Levanta los brazos y a través de tu cuerpo, girando las palmas hacia la cara mientras arqueas ligeramente la espalda. Termina con los pulgares apuntando hacia atrás. Vuelva a colocar los brazos en la posición inicial y repita. Continúe este movimiento durante 30 segundos. Descansa 30 segundos.</p> | <p>30 seg</p> |              |
| <p><b>Levanta el Talon de Pie</b></p>  | <p>Mientras estás de pie, levántate de los dedos mientras levantas los talones del suelo lo más alto que puedas. Pausa durante 2 segundos. Baja los talones al suelo con control. Repite continuamente este movimiento completo, arriba y abajo durante 30 segundos. Descansa durante 30 segundos</p>                                                                                                                                                            | <p>30 seg</p> |  <p>12</p> |



| Ejercicio                        | Instrucciones                                                                                                                                                                                                                                                                                                                                                               | Tiempo        | Diagrama                                                                                      |
|----------------------------------|-----------------------------------------------------------------------------------------------------------------------------------------------------------------------------------------------------------------------------------------------------------------------------------------------------------------------------------------------------------------------------|---------------|-----------------------------------------------------------------------------------------------|
| <p><b>Pasos Laterales</b></p>    | <p>Párate derecho. Da un paso lateral hacia un lado. Sigue con la otra pierna. Mantén el equilibrio. Mantener una postura y respiración adecuadas. Repita para la longitud de su contador o cómoda, o 5 pasos en una dirección. Repita ir en la otra dirección. Continúe retrocediendo hacia adelante y hacia atrás durante 30 segundos en total. Descansa 30 segundos.</p> | <p>30 seg</p> |             |
| <p><b>Flexiones de pared</b></p> | <p>Comience con las manos en la pared y los codos y el tronco recto. Doble lentamente los codos, bajándote hacia la pared. A continuación, empuje lentamente lejos de la pared. Tus manos nunca deben estar más altas que el nivel de tus hombros. Repite este ejercicio durante 30 s. Descansa durante 30 s.</p>                                                           | <p>30 seg</p> | <p>5</p>  |

**¡Felicitaciones! ¡Lo hiciste!**  
**¡Descansa y mantente hidratado!**

## Enlaces de vídeo de YouTube útiles adicionales

Estos videos proporcionan sugerencias de ejercicios generales adicionales que pueden ser útiles para algunos pacientes. Por favor, utilice la discreción al realizar estos ejercicios por su cuenta. Por favor, no proceda si experimenta dificultad para respirar, dolor en el pecho, palpitaciones, agotamiento, o mareos / mareos, y consulte con un médico o fisioterapeuta para obtener más orientación

- Parte superior del cuerpo, inglés: <https://youtu.be/o7ulS3B9pnY>
- Cuerpo superior, español: <https://youtu.be/eq1anDP2pZ0>
- Ejercicios de mano, Inglés: <https://youtu.be/uZY3Y00awQw>
- Ejercicios de manos, español: <https://youtu.be/XLdfsBv-vHs>
- Ejercicio de la parte inferior del cuerpo:
  - Introducción: <https://youtu.be/aP7kB6W78Yw>
  - Supine Principiante: <https://youtu.be/FMgTN78Uf6E>
  - Supine Nivel medio: [https://youtu.be/dFdsji\\_YPGU](https://youtu.be/dFdsji_YPGU)
  - Supine Advanced: <https://youtu.be/5GyFTp hhA7Y>
  - Sentado: <https://youtu.be/vcfHr0UrYR4>
- **Ejercicios de Respiración:**
  - Espirometría de incentivos: <https://youtu.be/ggbJLKrcx48>
  - Pulgar de un paseo (PNF): <https://youtu.be/NN3CGdOfEcI>
  - Huffing: <https://youtu.be/4ZdSgqUfRxY>
  - Respiración focalizada (labio fruncido): <https://youtu.be/4JckzNccv90>
  - Respiración diafragmática: <https://youtu.be/WUumD29uvmg>
- **Relajación (Yoga/Tai Chi):**
  - Tai Chi: <https://youtu.be/sx9li6V3LmY>

| <b>Registro de ejercicios</b>                                                                                                                                                                                  |                               |                                  |                                 |                                    |                                  |
|----------------------------------------------------------------------------------------------------------------------------------------------------------------------------------------------------------------|-------------------------------|----------------------------------|---------------------------------|------------------------------------|----------------------------------|
| (Cuando haya terminado, por favor tome una foto de este registro y amablemente envíelo por correo electrónico a <a href="mailto:PTFacultyPractice@cumc.columbia.edu">PTFacultyPractice@cumc.columbia.edu</a> ) |                               |                                  |                                 |                                    |                                  |
| <b>Día</b>                                                                                                                                                                                                     | <b>Nivel de oxígeno antes</b> | <b>Frecuencia cardiaca antes</b> | <b>Nivel de oxígeno después</b> | <b>Frecuencia cardíaca Después</b> | <b>Índice Esfuerzo Percibido</b> |
| 1                                                                                                                                                                                                              |                               |                                  |                                 |                                    |                                  |
| 2                                                                                                                                                                                                              |                               |                                  |                                 |                                    |                                  |
| 3                                                                                                                                                                                                              |                               |                                  |                                 |                                    |                                  |
| 4                                                                                                                                                                                                              |                               |                                  |                                 |                                    |                                  |
| 5                                                                                                                                                                                                              |                               |                                  |                                 |                                    |                                  |
| 6                                                                                                                                                                                                              |                               |                                  |                                 |                                    |                                  |
| 7                                                                                                                                                                                                              |                               |                                  |                                 |                                    |                                  |
| 8                                                                                                                                                                                                              |                               |                                  |                                 |                                    |                                  |
| 9                                                                                                                                                                                                              |                               |                                  |                                 |                                    |                                  |
| 10                                                                                                                                                                                                             |                               |                                  |                                 |                                    |                                  |
| 11                                                                                                                                                                                                             | <b>Día de descanso</b>        |                                  |                                 |                                    |                                  |
| 12                                                                                                                                                                                                             |                               |                                  |                                 |                                    |                                  |
| 13                                                                                                                                                                                                             |                               |                                  |                                 |                                    |                                  |
| 14                                                                                                                                                                                                             |                               |                                  |                                 |                                    |                                  |
